# Supplementary material for: The architecture of mammalian ribosomal protein promoters
Source: PubMed Central journal article supplement (PMC554972; doi:10.1186/1471-2148-5-15), 2005-02-13
Supplement: 1471-2148-5-15-S1.pdf [file 1471-2148-5-15-S1.pdf]

**SUPPLEMENTARY TABLE 1**

**EXPERIMENTAL DETERMINATIONS OF THE TSP (CAP SITE)**

OC-a: oligo-capping results reported in Yoshihama, et. al. (2002). OC-b: oligo-capping results in the DBTSS database. PE/S1: primer extension and/or nuclease protection experiments. Symbols show the relationships to the tsp's selected in this study: ★ or ◆, exact correspondence to designated tsp or the most frequent hit, respectively; ☆ or ◇, correspondence to an observed variant tsp; ●, exact correspondence to experimentally determined tsp; encircled numbers (①, □, etc) show the distance in nucleotides to the nearest reported tsp; x, substantially different from selected tsp; —, no data available. Hs, human; Mm, mouse; Rn, rat; Gg, chicken; Xl, amphibian; Om, fish.

\*:the tsp was re-determined by Avni, et. al. (1994).

| RP   | Hs Ref Seq<br>(NM_.....) | OC-a<br>Hs | OC-b<br>Hs | PE/S1 Hs<br>(Acc. No.) | Mm Ref Seq<br>(NM_.....) | OC-b<br>Mm | PE/S1 Mm<br>(Acc. No.) | PE/S1 Other<br>(Acc. No.) |
|------|--------------------------|------------|------------|------------------------|--------------------------|------------|------------------------|---------------------------|
| SA   | 002295                   | ★          | ◆          |                        | 011029                   | ◇          |                        |                           |
| S2   | 002952                   | ★          | —          |                        | 008503                   | ①          |                        |                           |
| S3   | 001005                   | ★          | ◆          |                        | 012052                   | ◇          |                        | Xl ① Z34530               |
| S3a  | 001006                   | ★          | ◇          | ● X87373               | 016959                   | ①          | ● Z83368               |                           |
| S4X  | 001007                   | ★          | ◆          | ① L24369               | 009094                   | ①          | ● L24371               |                           |
| S5   | 001009                   | ★          | ◆          |                        | 009095                   | ◇          |                        |                           |
| S6   | 001010                   | ☆          | ◆          | ● M77232<br>① X67309   | 009096                   | ①          | ● Z54209               | Xl □ AF020551             |
| S7   | 001011                   | ★          | ◆          | x Z25749               | 011300                   | ①          | x AF043285             | Xl ● X71081               |
| S8   | 001012                   | ★          | ◆          | ● X67247               | 009098                   | ①          |                        |                           |
| S9   | 001013                   | ☆          | □          |                        |                          | —          |                        |                           |
| S10  | 001014                   | ★          | ◆          |                        | 025963                   | ◇          |                        |                           |
| S11  | 001015                   | ☆          | ◆          |                        | 013725                   | —          |                        |                           |
| S12  | 001016                   | ★          | ◇          |                        | 011295                   | —          |                        |                           |
| S13  | 001017                   | ★          | ◆          |                        | 026533                   | ◇          |                        |                           |
| S14  | 005617                   | ★          | □          | ● M13934               | 020600                   | ①          |                        |                           |
| S15  | 001018                   | □          | ◆          | x M32405               | 009091                   | ①          | ● Rn D11388            | Gg □ D90425               |
| S15a | 001019                   | ★          | ①          |                        | 170669                   | —          |                        |                           |
| S16  | 001020                   | ★          | ◇          |                        | 013647                   | —          | ● M11408               |                           |
| S17  | 001021                   | ★          | ◆          | ① M18000               | 009092                   | ①          |                        |                           |
| S18  | 022551                   | ★          | ◆          |                        | 011296                   | ①          |                        |                           |
| S19  | 001022                   | ★          | ◆          |                        | 023133                   | ◇          |                        |                           |
| S20  | 001023                   | ★          | ◆          |                        | 026147                   | ◇          |                        |                           |
| S21  | 001024                   | ★          | ◆          |                        | 025587                   | —          |                        |                           |
| S23  | 001025                   | ★          | ◆          |                        | 024175                   | ①          |                        |                           |
| S24  | 033022                   | ★          | ◆          | □ U12202               | 011297                   | ◇          | x X71972               | Xl ③ M33517               |
| S25  | 001028                   | ★          | ◇          |                        | 024266                   | —          |                        |                           |
| S26  | 001029                   | ☆          | ①          |                        | 013765                   | ①          |                        |                           |
| S27  | 001030                   | ★          | ◆          |                        | 027015                   | —          |                        |                           |

|      |        |   |   |                      |        |   |             |                              |
|------|--------|---|---|----------------------|--------|---|-------------|------------------------------|
| S27a | 002954 | ★ | ◇ |                      | 024277 | — |             |                              |
| S28  | 001031 | ★ | ◆ |                      | 016844 | — |             |                              |
| S29  | 001032 | ★ | ◇ |                      | 009093 | ① |             |                              |
| S30  | 001997 | ★ | — |                      |        | — |             |                              |
| L3   | 000967 | ☆ | ◆ |                      | 013762 | ① |             |                              |
| L4   | 000968 | ★ | ◆ |                      |        | — |             |                              |
| L5   | 000969 | ★ | ◆ |                      | 016980 | — |             | Gg ① D10737                  |
| L6   | 000970 | ★ | ◆ |                      | 011290 | ◇ |             |                              |
| L7   | 000971 | ★ | ④ |                      | 011291 | ◇ | ● M29015    |                              |
| L7a  | 000972 | ★ | ◆ | ● X52138<br>● X61923 | 013721 | ③ | ●④ X54067   | Gg ● D14522<br>● X62641      |
| L8   | 033301 | ★ | ◆ |                      | 012053 | ◇ |             |                              |
| L9   | 000661 | ★ | ◆ |                      | 011292 | ③ |             |                              |
| L10  | 006013 | ★ | ◆ |                      | 052835 | ① |             |                              |
| L10a | 007104 | ★ | ◆ |                      | 011287 | ◇ |             |                              |
| L11  | 000975 | — | ◆ |                      |        | — |             |                              |
| L12  | 000976 | ★ | ◆ |                      | 009076 | ① |             |                              |
| L13  | 000977 | — | ◆ |                      | 016738 | ◇ |             |                              |
| L13a | 012423 | ☆ | ◆ |                      | 009438 | ◇ | ● X51528 *  |                              |
| L14  | 003973 | ☆ | ◆ |                      |        | — |             | Xl ● X15678                  |
| L15  | 002948 | ★ | ◆ |                      | 025586 | — |             |                              |
| L17  | 000985 | ★ | ◆ |                      |        | — |             |                              |
| L18  | 000979 | ★ | ◆ |                      | 009077 | — |             | Xl ● X05025<br>Om ● AF240376 |
| L18a | 000980 | ★ | ◆ |                      |        | — |             |                              |
| L19  | 000981 | ★ | ◆ | ● X82201             | 009078 | ① | ● Rn X82202 |                              |
| L21  | 000982 | ★ | ◆ |                      | 019647 | □ |             |                              |
| L22  | 000983 | ★ | ◇ |                      | 009079 | ◇ |             |                              |
| L23  | 000978 | ★ | ◆ |                      | 022891 | ◇ |             |                              |
| L23a | 000984 | ★ | ◇ |                      |        | — |             |                              |
| L24  | 000986 | ★ | ◇ |                      | 024218 | ① |             |                              |
| L26  | 000987 | ★ | ◆ |                      | 009080 | ① |             |                              |
| L27  | 000988 | ★ | ⑦ |                      | 011289 | ① |             |                              |
| L27a | 000990 | ★ | ◇ |                      | 011975 | — |             |                              |
| L28  | 000991 | ★ | ◆ |                      | 009081 | ① |             |                              |
| L29  | 000992 | — | ◇ |                      | 009082 | ① | □ AF236069  |                              |
| L30  | 000989 | ☆ | ◆ |                      | 009083 | ① | ● K02928    | Gg ① D14521                  |
| L31  | 000993 | ★ | ◇ |                      | 053257 | ◇ |             |                              |
| L32  | 000994 | ☆ | ◆ |                      | 172086 | — | ● K02060    |                              |
| L34  | 000995 | ★ | — |                      |        | — |             |                              |
| L35  | 007209 | ☆ | ◆ |                      | 025592 | ① |             |                              |
| L35a | 000996 | ★ | — |                      | 021338 | ③ |             |                              |
| L36  | 033643 | ★ | — |                      | 018730 | ◇ |             |                              |
| L36a | 021029 | ☆ | ◆ |                      |        | — |             |                              |
| L37  | 000997 | ★ | ◆ |                      | 026069 | ① |             |                              |

|      |        |   |   |  |        |   |             |             |
|------|--------|---|---|--|--------|---|-------------|-------------|
| L37a | 000998 | — | ◆ |  | 009084 | ◇ |             | Gg ● D14167 |
| L38  | 000999 | — | ◆ |  | 023372 | ① |             |             |
| L39  | 001000 | ☆ | ◆ |  | 026055 | ① |             |             |
| L40  | 003333 | ★ | ◆ |  |        | — |             |             |
| L41  | 021104 | ★ | — |  | 018860 | ① |             |             |
| LP0  | 001002 | ☆ | ◆ |  |        | — |             |             |
| LP1  | 001003 | ☆ | ◆ |  | 018853 | ◇ |             |             |
| LP2  | 001004 | ☆ | ◆ |  | 026020 | ◇ | ● Rn X55153 |             |

Avni, D., Shama, S., Loreni, F., and Meyuhas, O. 1994. Vertebrate mRNAs with a 5'-terminal pyrimidine tract are candidates for translational repression in quiescent cells: Characterization of the translational *cis*-regulatory element. *Mol. Cell. Biol.* **14**: 3822-3833.
