# Supplementary material for: The architecture of mammalian ribosomal protein promoters
Source: PubMed Central journal article supplement (PMC554972; doi:10.1186/1471-2148-5-15), 2005-02-13
Supplement: 1471-2148-5-15-S2.pdf [file 1471-2148-5-15-S2.pdf]

SUPPLEMENTARY TABLE 2

**SEQUENCE ANALYSIS OF RIBOSOMAL PROTEIN PROMOTERS**

h-s and m-s: database sources of human and mouse sequences, respectively (U, UCSC Genome; N, NCBI; C, Celera; R, RPDB). h-5'n or m-5'n: nucleotides of 5'-flanking sequence that were analyzed. h-5'is or m-5'is: nucleotides upstream of the tsp where nearest repetitive insertion sequences (sines or B1/B2 elements) are located.

Total rp genes analyzed: 32 small subunit and 47 large subunit = 79 rp genes

| <b>RP</b> | <b>h-s</b> | <b>h-5'n</b> | <b>h-5'is</b> | <b>m-s</b> | <b>m-5'n</b> | <b>m-5'is</b> | <b>Other Orthologues</b> |
|-----------|------------|--------------|---------------|------------|--------------|---------------|--------------------------|
| SA        | R          | 999          | 634           | R          | 1000         | 372           |                          |
| S2        | U          | 802          |               | U          | 1004         | 599           |                          |
| S3        | U          | 989          | 163           | U          | 975          | 214           | Xenopus and Fugu         |
| S3a       | U          | 1017         | 349           | U          | 975          | 550           |                          |
| S4X       | U          | 1012         | 353           | U          | 1049         | 880           |                          |
| S5        | U          | 975          |               | U          | 979          | 721           |                          |
| S6        | U          | 1000         | 326           | U          | 990          | 646           | Xenopus                  |
| S7        | U          | 1047         | 351           | U          | 1045         | 389           | Xenopus and Fugu         |
| S8        | U          | 1000         | 237           | U          | 594          | 251           |                          |
| S9        | U          | 984          | 231           | N          | 1038         | 379           |                          |
| S10       | U          | 1006         | 263           | N          | 1036         | 255           |                          |
| S11       | U          | 1006         | 497           | N          | 991          | 779           |                          |
| S12       | U          | 997          | 515           | U          | 1044         |               |                          |
| S13       | U          | 1006         | 804           | U          | 1001         | 747           |                          |
| S14       | U          | 1017         | 384           | U          | 996          | 874           | Chinese hamster          |
| S15       | U          | 1027         | 270           | U          | 1003         | 176           | Rat and Chicken          |
| S15a      | U          | 785          | 216           | N          | 389          | 179           |                          |
| S16       | U          | 998          |               | U          | 950          | 826           |                          |
| S17       | U          | 1001         | 464           | U          | 1082         |               |                          |
| S18       | U          | 1002         | 729           | U          | 978          | 726           |                          |
| S19       | U          | 1036         | 793           | U          | 921          | 764           |                          |
| S20       | U          | 1004         |               | U          | 555          | 411           |                          |
| S21       | U          | 1000         | 665           | N          | 1050         | 600           |                          |
| S23       | U          | 1000         | 575           | U          | 984          | 931           |                          |
| S24       | U          | 998          | 563           | U          | 969          | 247           | Xenopus and Fugu         |
| S25       | U          | 1000         | 328           | N          | 1063         | 565           |                          |
| S26       | U          | 998          | 655           | U          | 739          | 682           |                          |
| S27       | R          | 505          | 398           | R          | 1000         | 440           |                          |
| S27a      | U          | 1002         |               | U          | 881          |               |                          |
| S28       | U          | 1000         | 900           | N          | 252          |               |                          |
| S29       | U          | 999          | 202           | U          | 70           |               |                          |
| S30       | R          | 551          |               | R          | 1000         |               |                          |
| L3        | U          | 999          | 701           | U          | 979          | 654           |                          |
| L4        | U          | 1000         |               | N          | 1030         |               |                          |
| L5        | U          | 987          | 229           | C          | 1003         | 192           | Chicken                  |
| L6        | U          | 1053         | 124           | U          | 1019         | 159           |                          |

|      |   |      |     |   |      |     |                     |
|------|---|------|-----|---|------|-----|---------------------|
| L7   | U | 997  | 833 | U | 1032 | 199 |                     |
| L7a  | U | 1001 | 293 | U | 1001 | 810 | Chicken and Fugu    |
| L8   | U | 954  |     | U | 985  | 341 |                     |
| L9   | U | 1002 | 316 | U | 994  | 540 |                     |
| L10  | U | 1000 |     | U | 879  |     |                     |
| L10a | U | 984  |     | U | 984  |     |                     |
| L11  | U | 998  | 365 | N | 953  | 279 |                     |
| L12  | U | 1000 |     | U | 988  |     |                     |
| L13  | U | 1000 | 500 | U | 983  | 346 |                     |
| L13a | U | 999  | 435 | U | 995  |     |                     |
| L14  | U | 1008 | 620 | C | 300  | 212 | Xenopus             |
| L15  | R | 1000 |     | R | 1000 |     |                     |
| L17  | R | 1027 | 773 | R | 1001 | 160 |                     |
| L18  | U | 1000 | 805 | C | 631  | 564 | Xenopus and Tilapia |
| L18a | U | 1000 | 818 | C | 659  | 385 |                     |
| L19  | U | 1000 | 661 | U | 966  | 915 | Rat                 |
| L21  | N | 962  | 486 | U | 913  | 270 |                     |
| L22  | U | 999  | 432 | U | 1031 | 390 |                     |
| L23  | U | 1000 | 519 | U | 990  | 324 |                     |
| L23a | R | 682  | 200 | R | 1019 | 197 |                     |
| L24  | U | 997  | 258 | U | 842  | 410 |                     |
| L26  | U | 998  | 840 | U | 1006 | 541 |                     |
| L27  | U | 1009 | 430 | U | 1010 | 344 |                     |
| L27a | U | 999  | 730 | N | 1114 | 919 |                     |
| L28  | U | 1000 | 280 | U | 1014 | 463 |                     |
| L29  | U | 1043 | 262 | U | 976  | 197 |                     |
| L30  | U | 996  | 144 | U | 1000 | 529 | Chicken             |
| L31  | U | 1000 | 638 | U | 1009 | 681 |                     |
| L32  | U | 997  | 441 | N | 965  | 524 |                     |
| L34  | R | 1014 | 335 | R | 967  |     |                     |
| L35  | U | 1000 | 279 | U | 1000 | 422 |                     |
| L35a | R | 1009 | 548 | R | 998  | 473 |                     |
| L36  | U | 1001 | 227 | U | 833  | 229 |                     |
| L36a | R | 729  |     | R | 1000 |     |                     |
| L37  | U | 991  | 268 | N | 1050 | 539 |                     |
| L37a | U | 1000 | 300 | U | 983  | 428 | Chicken             |
| L38  | U | 956  | 130 | U | 1012 | 186 |                     |
| L39  | U | 1000 | 743 | N | 1054 | 402 |                     |
| L40  | R | 931  | 525 | R | 1000 | 477 |                     |
| L41  | U | 1043 | 398 | U | 568  | 351 | Carp                |
| LP0  | R | 990  |     | R | 1000 | 345 |                     |
| LP1  | N | 1040 | 468 | U | 999  | 732 |                     |
| LP2  | U | 1002 |     | U | 994  | 580 |                     |
