# Supplementary material for: The architecture of mammalian ribosomal protein promoters
Source: PubMed Central journal article supplement (PMC554972; doi:10.1186/1471-2148-5-15), 2005-02-13
Supplement: 1471-2148-5-15-S4.pdf [file 1471-2148-5-15-S4.pdf]

### SUPPLEMENTARY TABLE 3

#### OCCUPANCY MATRIX FOR INITIATOR REGION OF MAMMALIAN RIBOSOMAL PROTEIN GENES

Numbers at each position represent the occurrence of designated nucleotide(s) or gaps in the aligned initiator sequences of 79 orthologous human and mouse rp genes. A, G, C, and T are exact matches. Y = C or T, R = A or G, W = A or T, K = G or T, S = C or G, M = C or A. Consensus sequence was determined according to standard convention.

| Position | A | G  | C  | T  | Y  | R  | W | K | S | M | Gaps | Consensus | % pyrimidine |
|----------|---|----|----|----|----|----|---|---|---|---|------|-----------|--------------|
| - 8      | 7 | 13 | 14 | 11 | 9  | 11 | 0 | 2 | 5 | 4 | 3    | N         | 45           |
| - 7      | 4 | 12 | 22 | 8  | 11 | 6  | 1 | 5 | 4 | 2 | 4    | N         | 55           |
| - 6      | 2 | 12 | 25 | 14 | 7  | 3  | 2 | 3 | 4 | 2 | 4    | N         | 61           |
| - 5      | 5 | 11 | 17 | 15 | 13 | 4  | 0 | 3 | 4 | 4 | 3    | N         | 59           |
| - 4      | 5 | 8  | 37 | 5  | 10 | 0  | 1 | 1 | 6 | 3 | 3    | N         | 68           |
| - 3      | 0 | 13 | 11 | 29 | 9  | 4  | 0 | 5 | 2 | 2 | 4    | N         | 65           |
| - 2      | 1 | 8  | 10 | 34 | 10 | 1  | 2 | 3 | 6 | 2 | 2    | Y         | 70           |
| - 1      | 0 | 3  | 19 | 31 | 23 | 0  | 0 | 1 | 0 | 0 | 2    | Y         | 95           |
| + 1      | 0 | 0  | 79 | 0  | 0  | 0  | 0 | 0 | 0 | 0 | 0    | C         | 100          |
| + 2      | 0 | 0  | 16 | 55 | 7  | 0  | 0 | 0 | 0 | 0 | 1    | T         | 100          |
| + 3      | 0 | 0  | 28 | 40 | 11 | 0  | 0 | 0 | 0 | 0 | 0    | Y         | 100          |
| + 4      | 0 | 0  | 9  | 64 | 6  | 0  | 0 | 0 | 0 | 0 | 0    | T         | 100          |
| + 5      | 1 | 0  | 20 | 51 | 7  | 0  | 0 | 0 | 0 | 0 | 0    | T         | 99           |
| + 6      | 0 | 4  | 24 | 38 | 10 | 0  | 1 | 0 | 1 | 0 | 1    | Y         | 92           |
| + 7      | 0 | 14 | 36 | 17 | 10 | 0  | 0 | 1 | 0 | 0 | 1    | Y         | 81           |
| + 8      | 5 | 13 | 23 | 18 | 10 | 0  | 2 | 2 | 0 | 2 | 4    | Y         | 68           |
| + 9      | 5 | 17 | 21 | 15 | 7  | 4  | 1 | 1 | 4 | 0 | 4    | N         | 57           |
| + 10     | 4 | 14 | 27 | 20 | 3  | 3  | 0 | 1 | 1 | 3 | 3    | N         | 66           |
