# Supplementary material for: The architecture of mammalian ribosomal protein promoters
Source: PubMed Central journal article supplement (PMC554972; doi:10.1186/1471-2148-5-15), 2005-02-13
Supplement: 1471-2148-5-15-S7.pdf [file 1471-2148-5-15-S7.pdf]

**SUPPLEMENTARY TABLE 5**  
**HOUSEKEEPING GENE PROMOTERS**

| <b>GENE</b>                                                 | <b>EPD NUMBER ep--</b> |
|-------------------------------------------------------------|------------------------|
| Hs superoxide dismutase 1 ( <i>SOD-1</i> )                  | 07053                  |
| Hs dihydrofolate reductase ( <i>DHFR</i> )                  | 07056                  |
| Mm hypoxanthine phosphoribosyltransferase ( <i>HPRT</i> )   | 07058                  |
| Hs adenosine deaminase ( <i>ADA</i> )                       | 11113                  |
| Mm thymidylate synthetase ( <i>TS</i> )                     | 15031                  |
| Mm adenosine deaminase ( <i>ADA</i> )                       | 15032                  |
| Mm DNA polymerase b'                                        | 16049                  |
| Mm dihydrofolate reductase P1 ( <i>DHFR</i> )               | 24032                  |
| Hs thymidine kinase ( <i>TK</i> )                           | 25035                  |
| Mm RNA polymerase II ( <i>RP215</i> )                       | 28001                  |
| Hs glucose-6-phosphate dehydrogenase ( <i>G6PD</i> )        | 30014                  |
| Mm malate dehydrogenase cytosolic ( <i>MDH1</i> )           | 33012                  |
| Hs nucleolin                                                | 36018                  |
| Hs ADP-ribosylation factor 1 ( <i>ARF1</i> )                | 39001                  |
| Mm p97 ATPase                                               | 59010                  |
| Hs cyclin D1                                                | 60011                  |
| Hs DNA nucleotidylexotransferase ( <i>TdT</i> )             | 64003                  |
| Hs topoisomerase 3 alpha ( <i>TOP3A</i> )                   | 64007                  |
| Hs single stranded DNA binding protein 1                    | 73019                  |
| Hs glyceraldehyde-3-phosphate dehydrogenase ( <i>GAPD</i> ) | 73651                  |

The – 200 to +100 regions of these promoters were scanned for potential GABP, Sp1, YY1 and BoxA factor binding sites (as defined for nonaligned motifs in Figure 2).
